# Supplementary material
Source: MDPI journal article supplement (https://www.mdpi.com/2075-163X/7/12/250)
Supplement: s1 [file s1]

# Supplementary Materials: Chemical Force Microscopy Study on the Interactions of COOH Functional Groups with Kaolinite Surfaces: Implications for Enhanced Oil Recovery

Nipada Santha, Pablo Cubillas, Adrian Saw, Harry Brooksbank and Hugh Christopher Greenwell

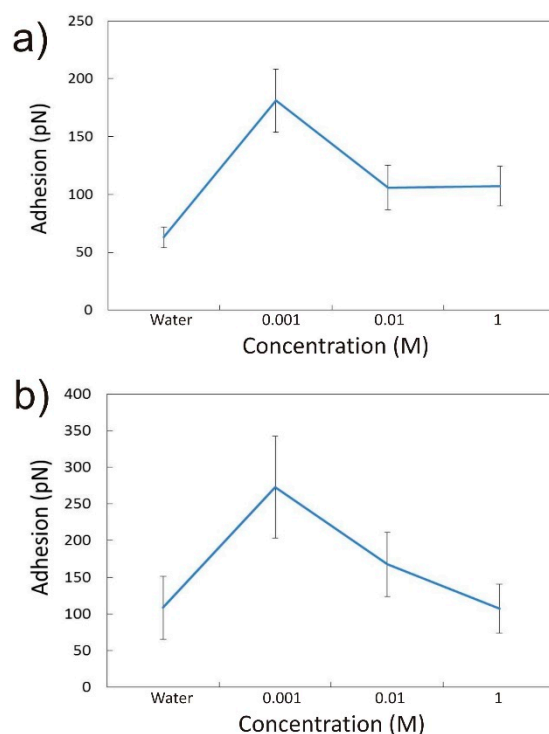

**Figure S1.** Adhesion graphs for experiments kao-Si-9 (a) and kao-Si-10 (b), performed with a  $\text{--COOH}$  probe over the siloxane face of kaolinite and in the presence of  $\text{CaCl}_2$  of various concentrations (0.001, 0.01 and 1 M). Both graphs show a decrease in adhesion as the  $\text{CaCl}_2$  is increased.

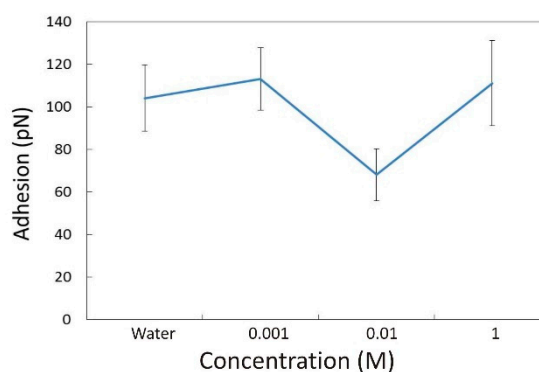

**Figure S2.** Adhesion graph for experiments kao-Si-9 performed with a  $\text{--COOH}$  probe over the siloxane face of kaolinite and in the presence of NaCl of various concentrations (0.001, 0.01 and 1 M). No clear trend on the measured adhesion is observed when varying the NaCl concentration.
